# Supplementary material
Source: PubMed Central journal article supplement (PMC4940140)
Supplement: NIHMS791547-supplement-1.pdf [file NIHMS791547-supplement-1.pdf]

## Supplementary Figures

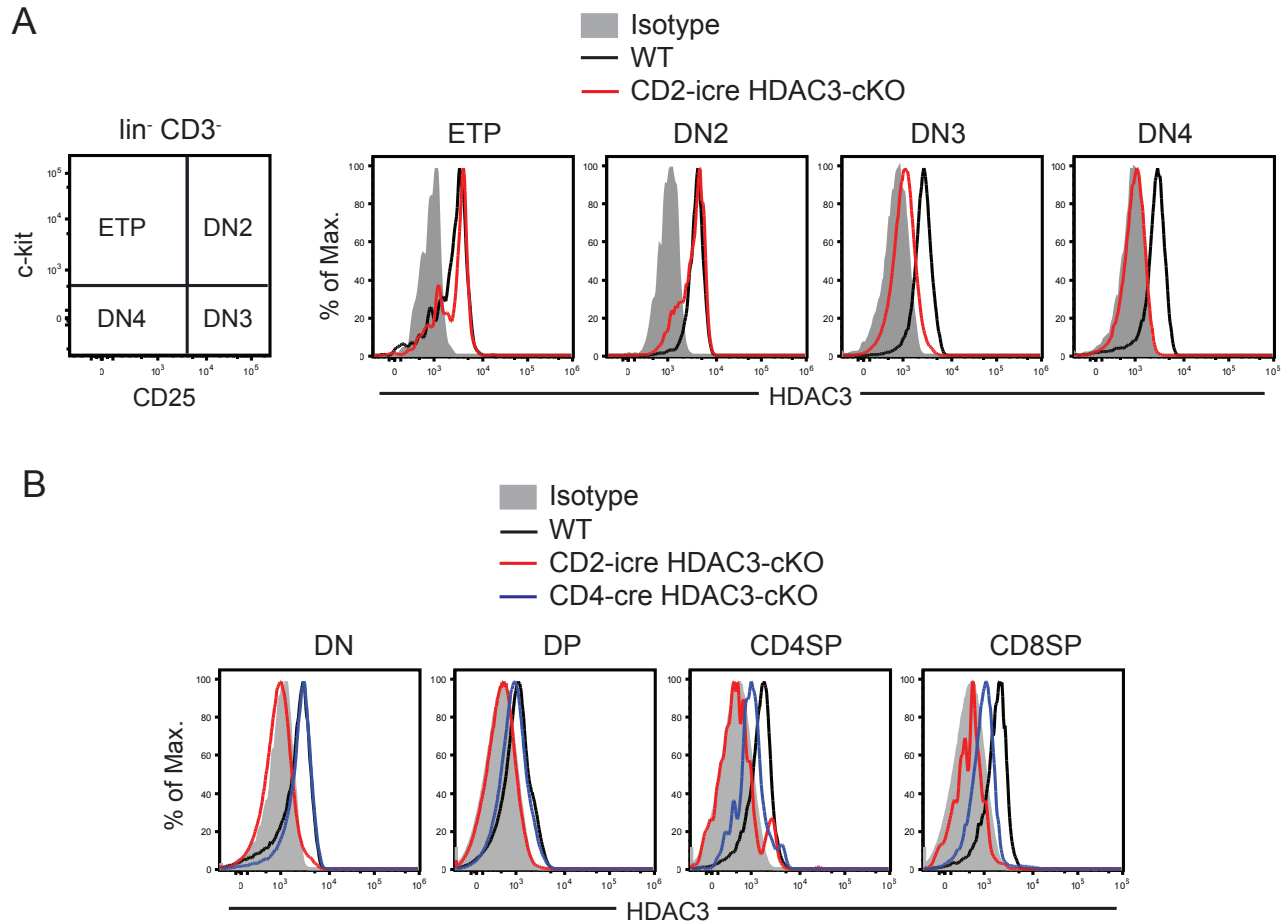

**Supplementary Figure 1. HDAC3 protein is absent starting at DN3 thymocytes.** (a) Intracellular staining of HDAC3 in DN subsets. DN thymocyte profiles using c-kit and CD25 from WT and HDAC3-cKO mice, previously gated on lin<sup>-</sup> (B220, CD11b, Gr-1, Ter119, CD19, CD11c, NK1.1, CD8 $\alpha$ , CD4, TCR $\beta$ ) CD3<sup>-</sup> thymocytes to examine ETP (c-kit<sup>+</sup>CD25<sup>-</sup>), DN2 (c-kit<sup>+</sup>CD25<sup>+</sup>), DN3 (c-kit<sup>-</sup>CD25<sup>+</sup>), and DN4 (c-kit<sup>-</sup>CD25<sup>-</sup>) between WT and CD2-icre HDAC3-cKO mice. Filled grey histogram represents isotype control. (b) Intracellular expression of HDAC3 in DN (lin<sup>-</sup>, CD3<sup>-</sup>), DP, CD4SP, and CD8SP thymocytes from WT, CD2-icre HDAC3-cKO, and CD4-cre HDAC3-cKO mice. SP thymocytes from CD2-icre HDAC3-cKO mice were gated off a semi-mature gate (CD24<sup>+</sup>TCR $\beta$ <sup>+</sup>), as many cells in the mature SP (CD24<sup>lo</sup>TCR $\beta$ <sup>+</sup>) gate are recirculating T cells (see Supplemental Figure 2). Data is representative of at least eleven mice per group from five independent experiments.

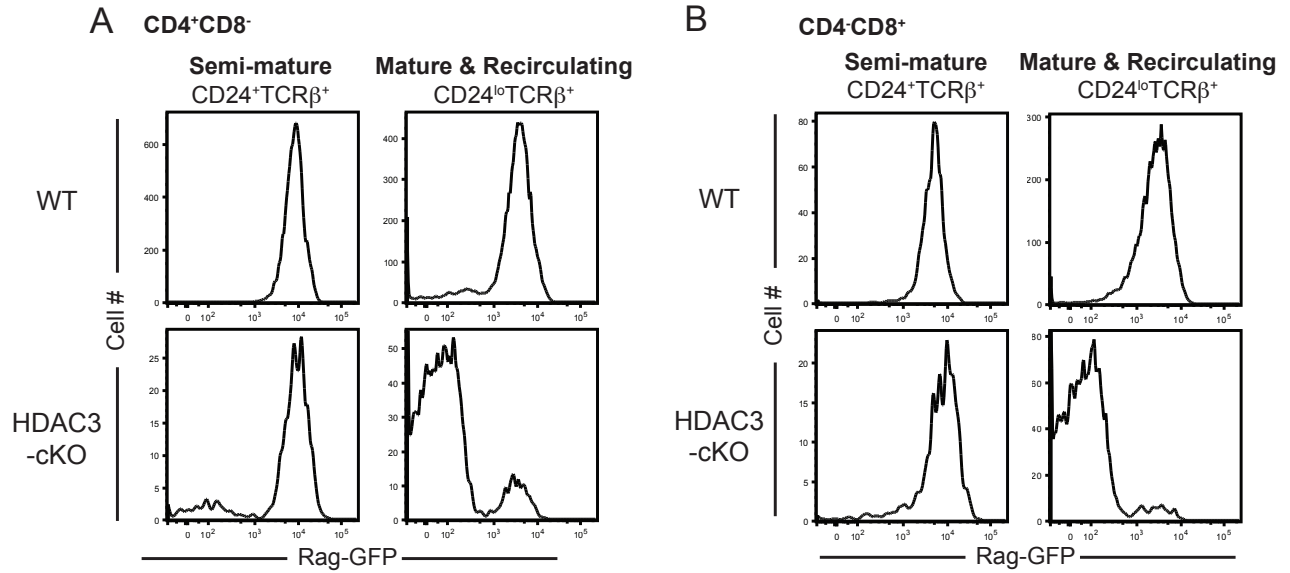

**Supplementary Figure 2. Majority of SP thymocytes in HDAC3-cKO mice are recirculating T cells.** Frequency of semi-mature SP thymocytes ( $CD24^+$ ,  $TCR\beta^+$ ,  $Rag-GFP^+$ ), mature SP thymocytes ( $CD24^{lo}$ ,  $TCR\beta^+$ ,  $Rag-GFP^+$ ), and recirculating T cells ( $CD24^{lo}$ ,  $TCR\beta^+$ ,  $Rag-GFP^-$ ) from WT and HDAC3-cKO mice. Data is representative of ten mice per group from seven independent experiments.

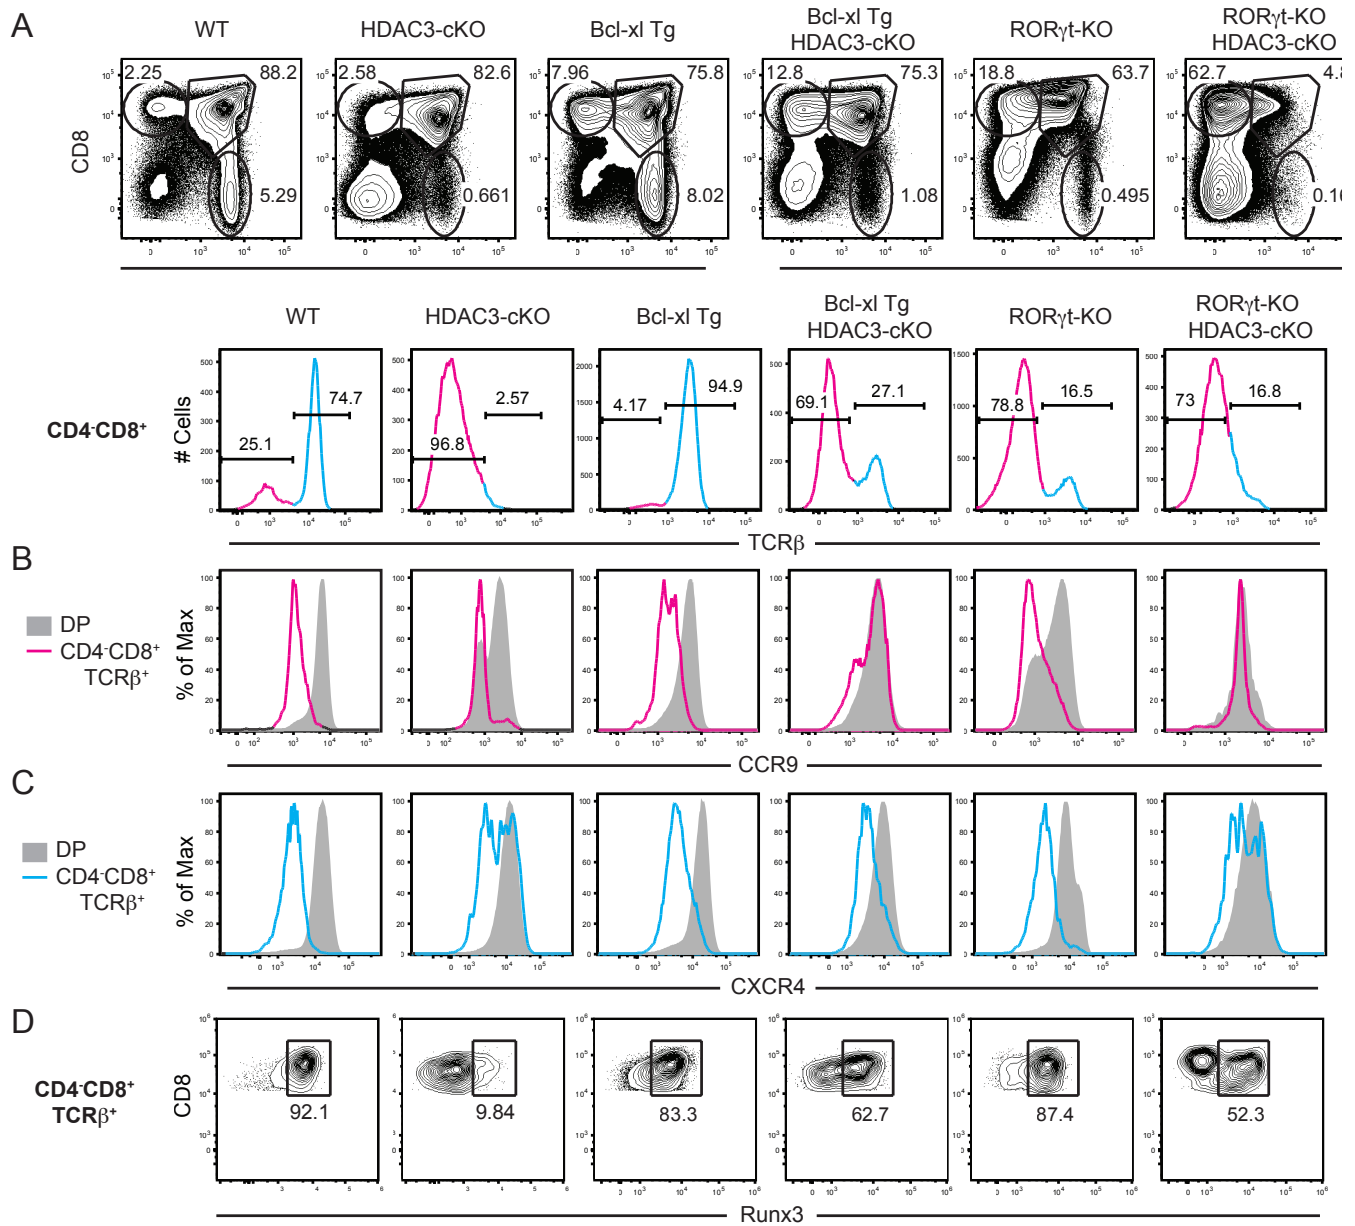

**Supplementary Figure 3. Bcl-xl Tg and RORγt-KO does not rescue development in HDAC3-cKO mice.** (A) CD4-versus-CD8 profile and TCRβ surface expression of CD4<sup>-</sup>CD8<sup>+</sup> thymocytes of WT, HDAC3-cKO, Bcl-xl Tg, Bcl-xl Tg HDAC3-cKO, RORγt-KO, and RORγt-KO HDAC3-cKO mice. (B-D) Surface expression of CCR9 on DP and CD4<sup>-</sup>CD8<sup>+</sup> TCRβ<sup>-</sup> thymocytes (B), surface expression CXCR4 on DP and CD4<sup>-</sup>CD8<sup>+</sup> TCRβ<sup>+</sup> thymocytes (C), and intracellular expression of Runx3 on CD4<sup>-</sup>CD8<sup>+</sup> TCRβ<sup>+</sup> thymocytes (D) from WT, HDAC3-cKO, Bcl-xl Tg, Bcl-xl Tg HDAC3-cKO, RORγt-KO, and RORγt-KO HDAC3-cKO mice. Data shown is the mean ± SEM of four mice from four independent experiments.

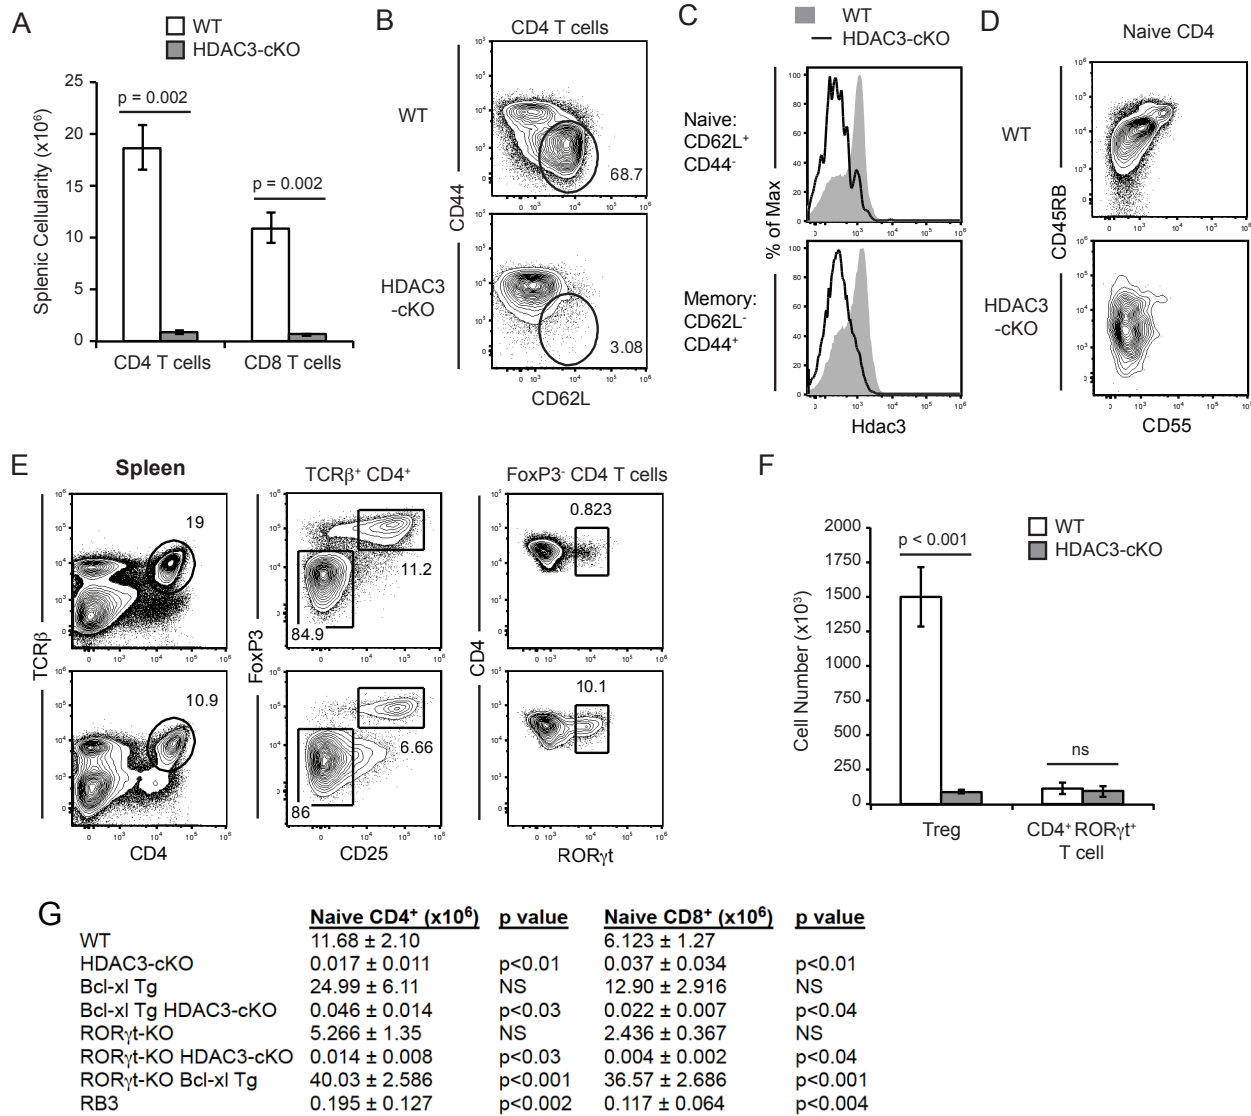

**Supplementary Figure 4. Splenic T cells in HDAC3-cKO mice.** (a) Cellularity of CD4<sup>+</sup> T cells (TCRβ<sup>+</sup>, CD4<sup>+</sup>) and CD8<sup>+</sup> T cells (TCRβ<sup>+</sup>, CD4<sup>+</sup>) in spleens from WT and HDAC3-cKO mice. Data shown are the means ± SEM of six mice per group from five independent experiments. (b) CD62L and CD44 expression on splenic CD4<sup>+</sup> T cells (TCRβ<sup>+</sup>, CD4<sup>+</sup>) from WT and HDAC3-cKO mice. Gate identifies percentage of naïve T cells (CD62L<sup>+</sup>, CD44<sup>-</sup>). Data represents at least five mice per group from five independent experiments. (c) Intracellular expression of HDAC3 in naïve (CD62L<sup>+</sup>, CD44<sup>-</sup>) and memory (CD62L<sup>-</sup>, CD44<sup>+</sup>) CD4<sup>+</sup> T cells from WT and HDAC3-cKO mice. Data represents at least three mice from two independent experiments. (d) CD55-versus-CD45RB expression on splenic CD4<sup>+</sup> naïve T cells from WT and HDAC3-cKO mice. Data represents at least three mice from two independent experiments. (e) Frequency and (f) cell number of Tregs (TCRβ<sup>+</sup>, CD4<sup>+</sup>, CD25<sup>+</sup>, FoxP3<sup>+</sup>) and RORγt<sup>+</sup> CD4<sup>+</sup> T cells (TCRβ<sup>+</sup>, CD4<sup>+</sup>, CD25<sup>-</sup>, FoxP3<sup>-</sup>) from the spleen of WT and HDAC3-cKO mice. Data shown is the mean ± SEM of at least four mice per group from at least two independent experiments. (g) Number of naïve (CD62L<sup>+</sup> CD44<sup>-</sup>) splenic CD4<sup>+</sup> and CD8<sup>+</sup> cells from each genotype was examined. Numbers represent average ± SEM from four WT, two HDAC3-cKO, two Bcl-xl Tg,

two Bcl-xl Tg HDAC3-cKO, two ROR $\gamma$ t-KO, two ROR $\gamma$ t-KO HDAC3-cKO, two ROR $\gamma$ t-KO Bcl-xl Tg and four RB3 mice. P values shown are calculated for each population as compared to WT in an unpaired Student t test using GraphPad Prism. NS, not significant.
